# Supplementary material for: Plant recognition by Trichoderma harzianum elicits upregulation of a novel secondary metabolite cluster required for colonization
Source: bioRxiv or medRxiv preprint supplement (doi:10.1101/2023.04.12.536597), 2023-12-28
Supplement: Supplementary file [file media-3.pdf]

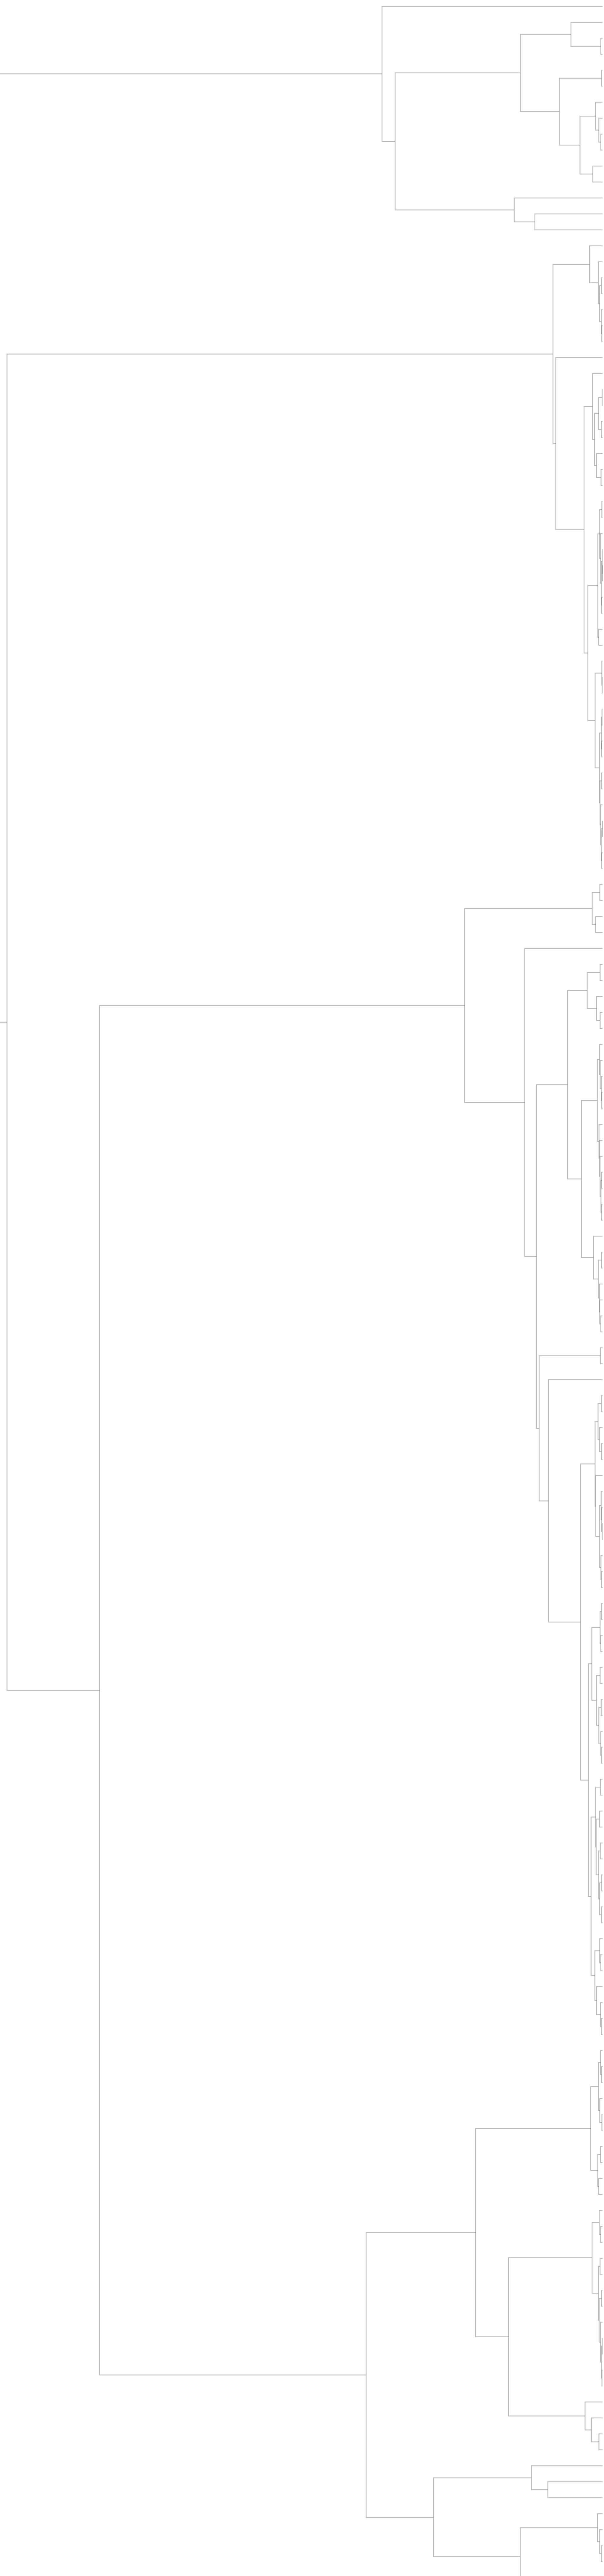

|                                                                                       | PCA1 | PCA2 | PCA3 | PCA4 | PCA5 | PCA6 | PCA7 |
|---------------------------------------------------------------------------------------|------|------|------|------|------|------|------|
| <i>Metarhizium humbei</i> ESALQ1638 (Cluster 143, score: 9.338)                       | 1    | 1    | 1    | 1    | 1    | 1    | 1    |
| <i>Vrioidothium virescens</i> ex Michener (Cluster 57, score: 13.398)                 | 1    | 1    | 1    | 1    | 1    | 1    | 1    |
| <i>Metarhizium ansopliae</i> ARSEF 549 (Cluster 23, score: 13.463)                    | 1    | 1    | 1    | 1    | 1    | 1    | 1    |
| <i>Metarhizium robertsii</i> ARSEF 23 (Cluster 30, score: 13.462)                     | 1    | 1    | 1    | 1    | 1    | 1    | 1    |
| <i>Trichoderma harzianum</i> CBS 226.95 (Cluster 1, score: 13.582)                    | 1    | 1    | 1    | 1    | 1    | 1    | 1    |
| <i>Trichoderma simmonsii</i> GH-51 (Cluster 11, score: 14.616)                        | 2    | 1    | 1    | 1    | 1    | 1    | 1    |
| <i>Trichoderma semiarbore</i> F059 (Cluster 9, score: 14.553)                         | 1    | 1    | 1    | 1    | 1    | 1    | 2    |
| <i>Trichoderma quizhouense</i> NJAU 4742 (Cluster 7, score: 13.52)                    | 1    | 1    | 1    | 1    | 1    | 1    | 1    |
| <i>Trichoderma lentiforme</i> CFAM-422 (Cluster 8, score: 13.524)                     | 1    | 1    | 1    | 1    | 1    | 1    | 1    |
| <i>Trichoderma harzianum</i> T6776 (Cluster 6, score: 13.465)                         | 1    | 1    | 1    | 1    | 1    | 1    | 1    |
| <i>Trichoderma virescens</i> Gu29-8 (Cluster 20, score: 13.472)                       | 1    | 1    | 1    | 1    | 1    | 1    | 1    |
| <i>Trichoderma gamsii</i> T6085 (Cluster 16, score: 8.335)                            | 1    | 1    | 1    | 1    | 1    | 1    | 1    |
| <i>Trichoderma gamsii</i> ASMH (Cluster 15, score: 10.412)                            | 1    | 1    | 1    | 1    | 1    | 1    | 1    |
| <i>Talaromyces islandicus</i> (Cluster 33, score: 7.318)                              | 1    | 1    | 1    | 1    | 1    | 1    | 1    |
| <i>Colletotrichum siamense</i> Cq363 (Cluster 106, score: 5.114)                      | 1    | 1    | 1    | 1    | 1    | 1    | 1    |
| <i>Gaeumannomyces tritici</i> R3-11a-1 (Cluster 179, score: 5.124)                    | 1    | 1    | 1    | 1    | 1    | 1    | 1    |
| <i>Pyricularia oryzae</i> 70-15 (Cluster 246, score: 5.118)                           | 1    | 1    | 1    | 1    | 1    | 1    | 1    |
| <i>Pyricularia grisea</i> O15937 (Cluster 245, score: 5.118)                          | 1    | 1    | 1    | 1    | 1    | 1    | 1    |
| <i>Pyricularia</i> sp. CBS 133598 N1919 (Cluster 236, score: 5.118)                   | 1    | 1    | 1    | 1    | 1    | 1    | 1    |
| <i>Pyricularia grisea</i> NI907 (Cluster 240, score: 5.118)                           | 1    | 1    | 1    | 1    | 1    | 1    | 1    |
| <i>Pyricularia pennisiatica</i> B36 (Cluster 313, score: 5.118)                       | 1    | 1    | 1    | 1    | 1    | 1    | 1    |
| <i>Alyxoria varia</i> (Cluster 99, score: 5.184)                                      | 1    | 1    | 1    | 1    | 1    | 1    | 1    |
| <i>Periconia macrospora</i> D5E2036 (Cluster 78, score: 5.147)                        | 1    | 1    | 1    | 1    | 1    | 1    | 1    |
| <i>Colletotrichum plurivorum</i> LFN00145 (Cluster 133, score: 5.133)                 | 1    | 1    | 1    | 1    | 1    | 1    | 1    |
| <i>Colletotrichum sojae</i> LFN0009 (Cluster 135, score: 5.134)                       | 1    | 1    | 1    | 1    | 1    | 1    | 1    |
| <i>Colletotrichum muscicola</i> LFN00074 (Cluster 134, score: 5.137)                  | 1    | 1    | 1    | 1    | 1    | 1    | 1    |
| <i>Coniochaeta</i> sp. 2T2.1 (Cluster 210, score: 5.124)                              | 1    | 1    | 1    | 1    | 1    | 1    | 1    |
| <i>Diaporthe ampelina</i> (Cluster 224, score: 5.143)                                 | 1    | 1    | 1    | 1    | 1    | 1    | 1    |
| <i>Pseudogymnosascus</i> sp. OSNY08 (Cluster 49, score: 4.14)                         | 1    | 1    | 1    | 1    | 1    | 1    | 1    |
| <i>Pseudogymnosascus</i> sp. VKM F-4517 (FW-2822) (Cluster 54, score: 4.142)          | 1    | 1    | 1    | 1    | 1    | 1    | 1    |
| <i>Colletotrichum fructicola</i> CJ54 (Cluster 119, score: 5.134)                     | 1    | 1    | 1    | 1    | 1    | 1    | 1    |
| <i>Colletotrichum chrysophilum</i> M932 (Cluster 123, score: 5.134)                   | 1    | 1    | 1    | 1    | 1    | 1    | 1    |
| <i>Colletotrichum gloeosporioides</i> Cg-14 (Cluster 108, score: 5.127)               | 1    | 1    | 1    | 1    | 1    | 1    | 1    |
| <i>Colletotrichum oenigma</i> Cq56 (Cluster 121, score: 5.134)                        | 1    | 1    | 1    | 1    | 1    | 1    | 1    |
| <i>Colletotrichum osianum</i> CPM 18580 (Cluster 100, score: 5.134)                   | 1    | 1    | 1    | 1    | 1    | 1    | 1    |
| <i>Colletotrichum viniferum</i> CGW01 (Cluster 129, score: 5.134)                     | 1    | 1    | 1    | 1    | 1    | 1    | 1    |
| <i>Colletotrichum siamense</i> CAD4 (Cluster 102, score: 5.12)                        | 1    | 1    | 1    | 1    | 1    | 1    | 1    |
| <i>Colletotrichum noveboracense</i> (Cluster 128, score: 5.131)                       | 1    | 1    | 1    | 1    | 1    | 1    | 1    |
| <i>Colletotrichum karsti</i> CKLH20 (Cluster 124, score: 5.135)                       | 1    | 1    | 1    | 1    | 1    | 1    | 1    |
| <i>Hymenoglyphus fraxineus</i> (Cluster 76, score: 5.131)                             | 1    | 1    | 1    | 1    | 1    | 1    | 1    |
| <i>Rhynchosporium agropyri</i> 04CH-RAC-A.6.1 (Cluster 72, score: 5.13)               | 1    | 1    | 1    | 1    | 1    | 1    | 1    |
| <i>Rhynchosporium commune</i> UK7 (Cluster 68, score: 5.13)                           | 1    | 1    | 1    | 1    | 1    | 1    | 1    |
| <i>Rhynchosporium secalis</i> 02CH-6a.1 (Cluster 73, score: 5.13)                     | 1    | 1    | 1    | 1    | 1    | 1    | 1    |
| <i>Cadophora</i> sp. DSE1049 (Cluster 70, score: 5.136)                               | 1    | 1    | 1    | 1    | 1    | 1    | 1    |
| <i>Cadophora</i> sp. M221 (Cluster 71, score: 5.135)                                  | 1    | 1    | 1    | 1    | 1    | 1    | 1    |
| <i>Leptodontidium</i> sp. MPI-SDFR-AT-0119 (Cluster 153, score: 5.136)                | 1    | 1    | 1    | 1    | 1    | 1    | 1    |
| <i>Leptodontidium</i> sp. 2 PMI 412 (Cluster 155, score: 5.131)                       | 1    | 1    | 1    | 1    | 1    | 1    | 1    |
| <i>Rhacocerosporidium</i> sp. MPI-PUGE-AT-0058 (Cluster 67, score: 5.134)             | 1    | 1    | 1    | 1    | 1    | 1    | 1    |
| <i>Drepanopeziza brunnea</i> f. sp. 'monogermtubi' Ptom1 (Cluster 145, score: 5.129)  | 1    | 1    | 1    | 1    | 1    | 1    | 1    |
| <i>Leotiomycetes</i> sp. MPI-SDFR-AT-0126 (Cluster 74, score: 5.134)                  | 1    | 1    | 1    | 1    | 1    | 1    | 1    |
| <i>Cadophora gregata</i> (Cluster 156, score: 5.134)                                  | 1    | 1    | 1    | 1    | 1    | 1    | 1    |
| <i>Cadophora gregata</i> f. sp. sojae (Cluster 158, score: 5.134)                     | 1    | 1    | 1    | 1    | 1    | 1    | 1    |
| <i>Cadophora malorum</i> M34 (Cluster 77, score: 5.135)                               | 1    | 1    | 1    | 1    | 1    | 1    | 1    |
| <i>Drepanopeziza brunnea</i> f. sp. 'multigermtubi' 214-2 (Cluster 182, score: 5.127) | 1    | 1    | 1    | 1    | 1    | 1    | 1    |
| <i>Colletotrichum sojae</i> CBS 518.97 (Cluster 127, score: 5.141)                    | 1    | 1    | 1    | 1    | 1    | 1    | 1    |
| <i>Colletotrichum tofeldiae</i> MAFF 712333 (Cluster 141, score: 5.157)               | 1    | 1    | 1    | 1    | 1    | 1    | 1    |
| <i>Lophatrema nuclea</i> CBS 627.86 (Cluster 59, score: 5.165)                        | 1    | 1    | 1    | 1    | 1    | 1    | 1    |
| <i>Hymenoglyphus varicosporioides</i> PMI_453 (Cluster 91, score: 5.169)              | 1    | 1    | 1    | 1    | 1    | 1    | 1    |
| <i>Microdochium trichoadiopsis</i> MPI-CAGE-CH-0230 (Cluster 136, score: 4.172)       | 1    | 1    | 1    | 1    | 1    | 1    | 1    |
| <i>Colletotrichum sublineola</i> TX43088 (Cluster 203, score: 7.177)                  | 1    | 1    | 1    | 1    | 1    | 1    | 1    |
| <i>Coniochaeta</i> sp. 2T2.1 (Cluster 211, score: 7.162)                              | 1    | 1    | 1    | 1    | 1    | 1    | 1    |
| <i>Diplacarpum rose</i> DoreE4 (Cluster 150, score: 7.171)                            | 1    | 1    | 1    | 1    | 1    | 1    | 1    |
| <i>Diplacarpum mali</i> PGHB (Cluster 159, score: 7.18)                               | 1    | 1    | 1    | 1    | 1    | 1    | 1    |
| <i>Marsornia coronariae</i> NL1 (Cluster 160, score: 7.183)                           | 1    | 1    | 1    | 1    | 1    | 1    | 1    |
| <i>Echria macrotheca</i> PSN4 (Cluster 229, score: 7.203)                             | 1    | 1    | 1    | 1    | 1    | 1    | 1    |
| <i>Colletotrichum falcatum</i> MAFF306170 (Cluster 207, score: 7.201)                 | 1    | 1    | 1    | 1    | 1    | 1    | 1    |
| <i>Colletotrichum cereale</i> CBS 129662 (Cluster 201, score: 7.204)                  | 1    | 1    | 1    | 1    | 1    | 1    | 1    |
| <i>Colletotrichum somersetense</i> CBS 131599 (Cluster 199, score: 7.203)             | 1    | 1    | 1    | 1    | 1    | 1    | 1    |
| <i>Colletotrichum caudatum</i> CBS 131602 (Cluster 200, score: 7.201)                 | 1    | 1    | 1    | 1    | 1    | 1    | 1    |
| <i>Colletotrichum eremochloae</i> CBS 129661 (Cluster 208, score: 7.206)              | 1    | 1    | 1    | 1    | 1    | 1    | 1    |
| <i>Colletotrichum tofeldiae</i> 0861 (Cluster 139, score: 7.204)                      | 1    | 1    | 1    | 1    | 1    | 1    | 1    |
| <i>Colletotrichum novius</i> CBS 125086 (Cluster 204, score: 7.207)                   | 1    | 1    | 1    | 1    | 1    | 1    | 1    |
| <i>Colletotrichum sublineola</i> S3.001 (Cluster 202, score: 7.207)                   | 1    | 1    | 1    | 1    | 1    | 1    | 1    |
| <i>Colletotrichum liragae</i> MAFF 242679 (Cluster 230, score: 7.188)                 | 1    | 1    | 1    | 1    | 1    | 1    | 1    |
| <i>Colletotrichum zoyisiae</i> MAFF235873 (Cluster 198, score: 7.204)                 | 1    | 1    | 1    | 1    | 1    | 1    | 1    |
| <i>Chaetomium</i> sp. MPI-SDFR-AT-0129 (Cluster 235, score: 7.188)                    | 1    | 1    | 1    | 1    | 1    | 1    | 1    |
| <i>Pyricularia grisea</i> NI907 (Cluster 238, score: 4.17)                            | 1    | 1    | 1    | 1    | 1    | 1    | 1    |
| <i>Pyricularia pennisiatica</i> B36 (Cluster 316, score: 7.202)                       | 1    | 1    | 1    | 1    | 1    | 1    | 1    |
| <i>Pyricularia oryzae</i> 70-15 (Cluster 248, score: 6.202)                           | 1    | 1    | 1    | 1    | 1    | 1    | 1    |
| <i>Colletotrichum trifolii</i> 543-2 (Cluster 126, score: 7.192)                      | 1    | 1    | 1    | 1    | 1    | 1    | 1    |
| <i>Colletotrichum orbiculare</i> MAFF 240422 104-T (Cluster 138, score: 7.196)        | 1    | 1    | 1    | 1    | 1    | 1    | 1    |
| <i>Bathelium mastoideum</i> (Cluster 130, score: 7.241)                               | 1    | 1    | 1    | 1    | 1    | 1    | 1    |
| <i>Bathelium mastoideum</i> (Cluster 131, score: 7.255)                               | 1    | 1    | 1    | 1    | 1    | 1    | 1    |
| <i>Xylariales</i> sp. PMI 506 (Cluster 144, score: 8.223)                             | 1    | 1    | 1    | 1    | 1    | 1    | 1    |
| <i>Diaporthe</i> sp. PMI 573 (Cluster 215, score: 7.221)                              | 1    | 1    | 1    | 1    | 1    | 1    | 1    |
| <i>Diaporthe batatas</i> CRI 302-4 (Cluster 216, score: 7.221)                        | 1    | 1    | 1    | 1    | 1    | 1    | 1    |
| <i>Diaporthe helianthi</i> 7/06 (Cluster 223, score: 7.219)                           | 1    | 1    | 1    | 1    | 1    | 1    | 1    |
| <i>Rutstroemia</i> sp. NJR-2017a BBW (Cluster 61, score: 7.202)                       | 1    | 1    | 1    | 1    | 1    | 1    | 1    |
| <i>Bisporella</i> sp. PMI 857 (Cluster 146, score: 7.218)                             | 1    | 1    | 1    | 1    | 1    | 1    | 1    |
| <i>Neoarthrium moseri</i> CBS 164.80 (Cluster 168, score: 7.222)                      | 1    | 1    | 1    | 1    | 1    | 1    | 1    |
| <i>Diaporthe laticola</i> FPH2015-502 (Cluster 225, score: 7.223)                     | 1    | 1    | 1    | 1    | 1    | 1    | 1    |
| <i>Hyenectria destructans</i> MPI-CAGE-AT-0134 (Cluster 231, score: 7.228)            | 1    | 1    | 1    | 1    | 1    | 1    | 1    |
| <i>Thermotheliales terrestris</i> NRRL 8126 (Cluster 227, score: 7.223)               | 1    | 1    | 1    | 1    | 1    | 1    | 1    |
| <i>Hyenectria</i> sp. MPI-CAGE-AT-0026 (Cluster 234, score: 7.227)                    | 1    | 1    | 1    | 1    | 1    | 1    | 1    |
| <i>Lentithecium ruviatile</i> CBS 122367 (Cluster 64, score: 7.221)                   | 1    | 1    | 1    | 1    | 1    | 1    | 1    |
| <i>Hyenectria robusta</i> PMI 751 (Cluster 232, score: 7.228)                         | 1    | 1    | 1    | 1    | 1    | 1    | 1    |
| <i>Diaporthe citri</i> NFHF-8-4 (Cluster 218, score: 7.216)                           | 1    | 1    | 1    | 1    | 1    | 1    | 1    |
| <i>Diaporthe amygdali</i> CAAS58 (Cluster 221, score: 7.215)                          | 1    | 1    | 1    | 1    | 1    | 1    | 1    |
| <i>Pestalotiopsis</i> sp. NCO98 (Cluster 120, score: 7.215)                           | 1    | 1    | 1    | 1    | 1    | 1    | 1    |
| <i>Diaporthe eres</i> CBS 160.32 (Cluster 220, score: 7.213)                          | 1    | 1    | 1    | 1    | 1    | 1    | 1    |
| <i>Clohesomyces aquaticus</i> CBS 115471 (Cluster 65, score: 7.211)                   | 1    | 1    | 1    | 1    | 1    | 1    | 1    |
| <i>Bysothecium circinans</i> CBS 675.92 (Cluster 69, score: 6.22)                     | 1    | 1    | 1    | 1    | 1    | 1    | 1    |
| <i>Massarina eburnea</i> CBS 473.64 (Cluster 63, score: 6.218)                        | 1    | 1    | 1    | 1    | 1    | 1    | 1    |
| <i>Truncatella angustata</i> S355 (Cluster 83, score: 7.212)                          | 1    | 1    | 1    | 1    | 1    | 1    | 1    |
| <i>Colletotrichum incanum</i> MAFF 238704 (Cluster 132, score: 7.208)                 | 1    | 1    | 1    | 1    | 1    | 1    | 1    |
| <i>Colletotrichum spoethianum</i> MAFF 239500 (Cluster 205, score: 7.201)             | 1    | 1    | 1    | 1    | 1    | 1    | 1    |
| <i>Coniochaeta hoffmannii</i> EXF-13287 (Cluster 209, score: 6.213)                   | 1    | 1    | 1    | 1    | 1    | 1    | 1    |
| <i>Xylariaceae</i> sp. FL1272 (Cluster 94, score: 7.215)                              | 1    | 1    | 1    | 1    | 1    | 1    | 1    |
| <i>Xylariaceae</i> sp. FL1019 (Cluster 95, score: 7.216)                              | 1    | 1    | 1    | 1    | 1    | 1    | 1    |
| <i>Halenospora varia</i> MPI-CAGE-AT-0135 (Cluster 92, score: 7.218)                  | 1    | 1    | 1    | 1    | 1    | 1    | 1    |
| <i>Peligeria leucophlebia</i> (Cluster 185, score: 6.208)                             | 1    | 1    | 1    | 1    | 1    | 1    | 1    |
| <i>Thozetella</i> sp. PMI 491 (Cluster 85, score: 7.218)                              | 1    | 1    | 1    | 1    | 1    | 1    | 1    |
| <i>Phialocephala subulpinia</i> UAMH 11012 (Cluster 98, score: 7.217)                 | 1    | 1    | 1    | 1    | 1    | 1    | 1    |
| <i>Pseudogymnosascus</i> sp. VKM F-4520 (FW-2644) (Cluster 43, score: 6.213)          | 1    | 1    | 1    | 1    | 1    | 1    | 1    |
| <i>Lobaria immita</i> (Cluster 161, score: 7.203)                                     | 1    | 1    | 1    | 1    | 1    | 1    | 1    |
| <i>Pseudogymnosascus</i> sp. 23342-1-11 (Cluster 42, score: 6.213)                    | 1    | 1    | 1    | 1    | 1    | 1    | 1    |
| <i>Truncatella angustata</i> MPI-SDFR-AT-0073 (Cluster 81, score: 7.215)              | 1    | 1    | 1    | 1    | 1    | 1    | 1    |
| <i>Lophiostoma macrostromum</i> CBS 122681 (Cluster 66, score: 7.213)                 | 1    | 1    | 1    | 1    | 1    | 1    | 1    |
| <i>Xylariaceae</i> sp. FLO016 (Cluster 93, score: 7.208)                              | 1    | 1    | 1    | 1    | 1    | 1    | 1    |
| <i>Neopetalotiopsis clavisporea</i> IHI 201606 (Cluster 86, score: 7.212)             | 1    | 1    | 1    | 1    | 1    | 1    | 1    |
| <i>Neopetalotiopsis</i> sp. 37M (Cluster 84, score: 7.213)                            | 1    | 1    | 1    | 1    | 1    | 1    | 1    |
| <i>Pestalotiopsis fici</i> W106-1 (Cluster 87, score: 7.213)                          | 1    | 1    | 1    | 1    | 1    | 1    | 1    |
| <i>Xylaria arbuscula</i> CBS 124340 (Cluster 152, score: 4.117)                       | 1    | 1    | 1    | 1    | 1    | 1    | 1    |
| <i>Xylaria venustula</i> FLO490 (Cluster 172, score: 4.119)                           | 1    | 1    | 1    | 1    | 1    | 1    | 1    |
| <i>Nemania diffusa</i> NC0034 (Cluster 178, score: 3.118)                             | 1    | 1    | 1    | 1    | 1    | 1    | 1    |
| <i>Ustilina deusta</i> IL1129 (Cluster 147, score: 4.118)                             | 1    | 1    | 1    | 1    | 1    | 1    | 1    |
| <i>Ustilina deusta</i> CBS 802-2 (Cluster 148, score: 4.119)                          | 1    | 1    | 1    | 1    | 1    | 1    | 1    |
| <i>Xylaria</i> sp. FL1777 (Cluster 167, score: 4.114)                                 | 1    | 1    | 1    | 1    | 1    | 1    | 1    |
| <i>Nemania</i> sp. FL0031 (Cluster 175, score: 4.116)                                 | 1    | 1    | 1    | 1    | 1    | 1    | 1    |
| <i>Nemania bipapillata</i> CP14 (Cluster 181, score: 3.105)                           | 1    | 1    | 1    | 1    | 1    | 1    | 1    |
| <i>Xylaria polymorpha</i> DSM 105756 (Cluster 195, score: 4.105)                      | 1    | 1    | 1    | 1    | 1    | 1    | 1    |
| <i>Nemania</i> sp. NC10429 (Cluster 176, score: 5.139)                                | 1    | 1    | 1    | 1    | 1    | 1    | 1    |
| <i>Xylaria flabelliformis</i> G536 (Cluster 174, score: 5.126)                        | 1    | 1    | 1    | 1    | 1    | 1    | 1    |
| <i>Xylaria reffleri</i> CBS 121673 (Cluster 194, score: 5.136)                        | 1    | 1    | 1    | 1    | 1    | 1    | 1    |
| <i>Nemania</i> sp. FLO916 (Cluster 177, score: 5.142)                                 | 1    | 1    | 1    | 1    | 1    | 1    | 1    |
| <i>Xylaria</i> sp. FLO064 (Cluster 164, score: 5.144)                                 | 1    | 1    | 1    | 1    | 1    | 1    | 1    |
| <i>Xylaria cubensis</i> CBS 116.85 (Cluster 162, score: 5.147)                        | 1    | 1    | 1    | 1    | 1    | 1    | 1    |
| <i>Xylaria flabelliformis</i> NC1011 (Cluster 173, score: 5.145)                      | 1    | 1    | 1    | 1    | 1    | 1    | 1    |
| <i>Nemania serpens</i> AK0256 (Cluster 186, score: 5.143)                             | 1    | 1    | 1    | 1    | 1    | 1    | 1    |
| <i>Xylaria curta</i> CBS 114988 (Cluster 154, score: 5.145)                           | 1    | 1    | 1    | 1    | 1    | 1    | 1    |
| <i>Xylaria sraposa</i> CBS 123580 (Cluster 190, score: 5.145)                         | 1    | 1    | 1    | 1    | 1    | 1    | 1    |
| <i>Xylaria</i> sp. FLO043 (Cluster 166, score: 5.144)                                 | 1    | 1    | 1    | 1    | 1    | 1    | 1    |
| <i>Xylaria castorea</i> CBS 124033 (Cluster 189, score: 5.145)                        | 1    | 1    | 1    | 1    | 1    | 1    | 1    |
| <i>Pseudogymnosascus hyperparasiticus</i> CBS 121739 (Cluster 196, score: 4.13        |      |      |      |      |      |      |      |
